# Supplementary material
Source: ML conference proceedings conference paper supplement (https://proceedings.neurips.cc/paper_files/paper/2007/hash/c6bff625bdb0393992c9d4db0c6bbe45-Abstract.html)
Supplement: Supplementary file 2 [file c6bff625bdb0393992c9d4db0c6bbe45-Supplemental.zip]

Archive with 2 entries (2 files):
- swimmer_package_small.zip
- main.pdf
